# Supplementary figures and images for: A solvent-free headspace GC/MS method for sensitive screening of N-nitrosodimethylamine in drug products
Source: Royal Society of Chemistry journal article supplement (doi:10.1039/d1ay01036k), 2021-01-01

### A) Blank

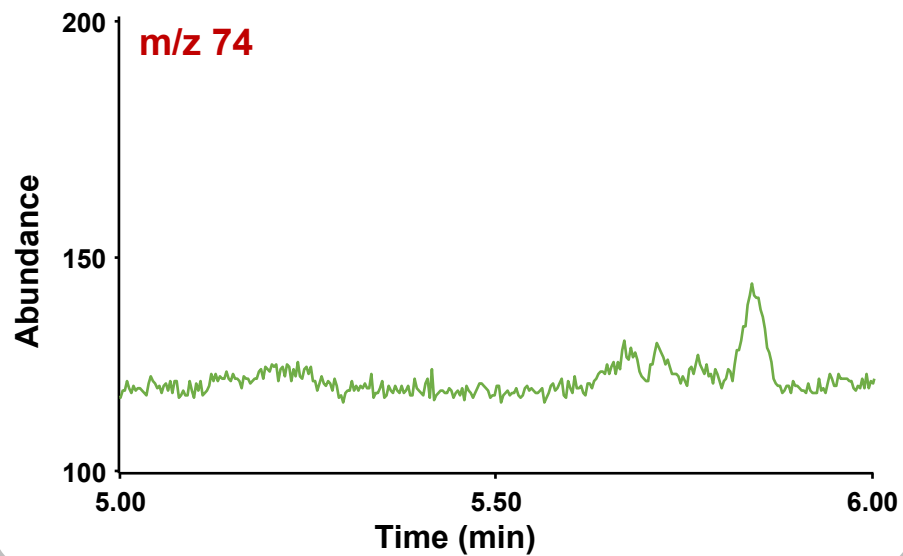

### B) Spiked sample

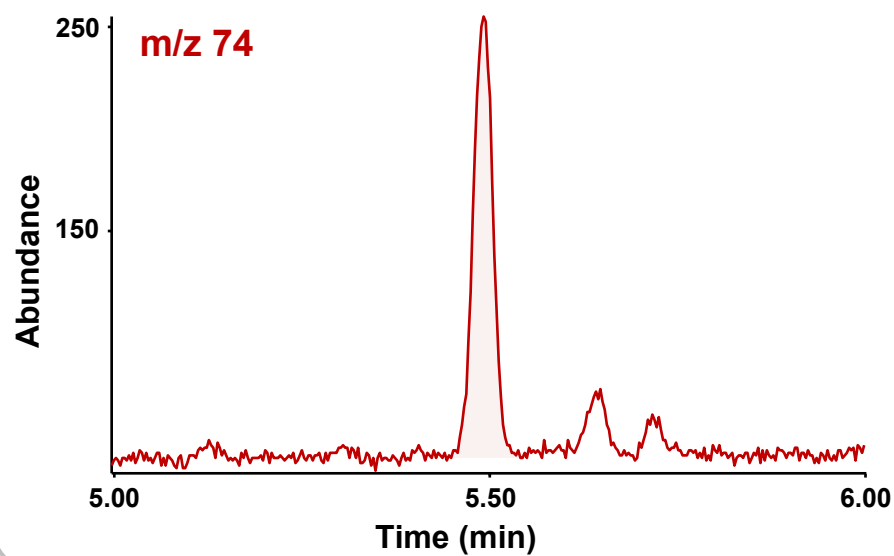

**Fig. S1. Ion chromatograms of NDMA for (A) blank and (B) spiked samples**

Supplement: d1ay01036k1.pdf [file d1ay01036k1.pdf]
